# Supplementary material for: Similar Squamous Cell Carcinoma Epithelium microRNA Expression in Never Smokers and Ever Smokers
Source: PubMed Central journal article supplement (PMC4636300; doi:10.1371/journal.pone.0141695), 2015-11-06
Supplement: pone.0141695.s008.pdf [file pone.0141695.s008.pdf]

Color Key



Heat map for NMF\_Gene Mean adjusted
